# Supplementary material
Source: publisher site journal article supplement (http://www.kjim.org/upload/media/kjim-2020-576-suppl2.pdf)
Supplement: Supplementary file 1 [file kjim-2020-576-suppl2.pdf]

**Supplementary Table 2. Logistic regression analyses of albuminuria in the 1:2 propensity score matched cohort**

| Variable                         | Odds ratio | 95% CI      | <i>p</i> value |
|----------------------------------|------------|-------------|----------------|
| Age, yr                          | 1.034      | 0.942–1.135 | 0.4855         |
| Male sex                         | 1.249      | 0.731–2.135 | 0.4158         |
| BMI, kg/m <sup>2</sup>           | 1.077      | 1.014–1.143 | 0.0162         |
| Abdominal girth, cm              | 1          | 0.990–1.011 | 0.9401         |
| SBP, mmHg                        | 1.026      | 1.012–1.041 | 0.0003         |
| DBP, mmHg                        | 1.042      | 1.021–1.062 | < 0.0001       |
| Hypertension                     | 4.222      | 2.403–7.416 | < 0.0001       |
| Diabetes mellitus                | 4.219      | 1.969–9.039 | 0.0002         |
| HbA1c, %                         | 2.033      | 1.520–2.718 | < 0.0001       |
| eGFR, mL/min/1.73 m <sup>2</sup> | 1          | 0.979–1.020 | 0.9645         |
| Renal cyst                       | 1.858      | 1.112–3.107 | 0.0181         |
| Triglyceride, mg/dL              | 1.004      | 1.002–1.006 | < 0.0001       |
| HDL-C, mg/dL                     | 0.992      | 0.975–1.010 | 0.3705         |
| LDL-C, mg/dL                     | 1.005      | 0.997–1.013 | 0.2050         |
| Uric acid, mg/dL                 | 1.260      | 1.082–1.468 | 0.0029         |

Albuminuria was defined as a urine albumin-to-creatinine ratio of > 30 µg/mg.

CI, confidence interval; BMI, body mass index; SBP, systolic blood pressure; DBP, diastolic blood pressure; HbA1c, hemoglobin A1c; eGFR, estimated glomerular filtration rate; HDL-C, high-density lipoprotein cholesterol; LDL-C, low-density lipoprotein cholesterol.
